# Supplementary material
Source: PubMed Central journal article supplement (PMC4587704)
Supplement: ASN.2014090939_ASN2014090939SupplementaryData.pdf [file ASN.2014090939_ASN2014090939SupplementaryData.pdf]

1

2                   **Interstitial Fibrosis Restricts Osmotic Water Transport**  
3                   **in Encapsulating Peritoneal Sclerosis**

4

5                   Johann Morelle, Amadou Sow, Nicolas Hautem, Caroline Bouzin, Ralph Crott,  
6                   Olivier Devuyst, and Eric Goffin

7

8                   **Supplemental data**

9

***Table of content***

|                             |                  |
|-----------------------------|------------------|
| <i>Complete methods</i>     | <i>PP. 2-10</i>  |
| <i>Supplemental figures</i> | <i>PP. 11-12</i> |
| <i>Supplemental table</i>   | <i>P. 13</i>     |

10

## 1 **COMPLETE METHODS**

### 2 *EPS patients and peritoneal transport analysis*

3 In agreement with EPS diagnosis criteria (1-3), EPS cases were defined as PD patients who  
4 presented with recurrent, partial or total, intestinal occlusion, with a definitive EPS diagnosis  
5 confirmed by CT-scan and/or laparotomy.

6 Peritoneal function was assessed yearly, with a modified 3.86% glucose-based peritoneal  
7 equilibration test (PET) (4,5), which has the advantages over the conventional 2.27% glucose-  
8 based PET (6) to assess **sodium sieving** (4) and allow the diagnosis of UF failure (net UF <  
9 400ml at the end of the 4h dwell with 3.86% glucose, as defined by the International Society  
10 for Peritoneal Dialysis (7)). Before instillation of the test solution, the peritoneal cavity was  
11 rinsed with 2 liters of 1.36% glucose dialysate and immediately drained after inflow  
12 completion. A 2 liters 3.86% test bag was then infused. Ten milliliters dialysate samples were  
13 collected from the test bag before inflow and 0, 30, 60, 120 and 240 min after its  
14 intraperitoneal instillation and blood samples were drawn after 120 min of dwell time. Net  
15 UF, i.e. the net difference between dialysate volume effluent and volume infused, was  
16 recorded. Measurements of serum urea, creatinine, glucose, and sodium, were performed  
17 using routine laboratory techniques on an LX 20 analyser (Beckman-Coulter, Fullerton, CA,  
18 USA). The Jaffe' method was used for creatinine determinations and the results were  
19 corrected for the interference with high glucose levels. The mass transfer area coefficient  
20 (MTAC) of creatinine was calculated according to Waniewski et al. (8). Sodium sieving  
21 ( $\Delta D/P$  sodium) was defined as the ratio of the difference between sodium concentrate  
22 dialysate at the beginning of the PET and at 1 h, on serum sodium with a correction for  
23 sodium diffusion using MTAC creatinine. The PET was part of the normal procedure of care  
24 for PD patients.

## 1 ***Peritoneal sampling and processing***

2 Para-umbilical biopsy samples of human parietal peritoneum were obtained from uremic  
3 patients at the time of catheter insertion, and PD patients at the time of catheter removal  
4 because of renal transplantation or transfer to hemodialysis as part of a routine protocol in our  
5 center, and processed as previously described (9). The time between last PET and peritoneal  
6 biopsy was similar in EPS and control patients ( $9.1 \pm 2.1$  versus  $7.5 \pm 1.6$  months in EPS and  
7 controls;  $P=0.61$ ). Samples were folded inside-out to avoid abrasion of the mesothelium,  
8 washed in ice-cold PBS, fixed in 4% paraformaldehyde in PBS (pH 7.4) and further  
9 embedded in paraffin. Whenever possible, a part of the sample was also snapfrozen in liquid  
10 nitrogen to perform protein extraction as described previously (9). The suspension was further  
11 homogenized with an Ultra-Turrax (Labortechnik, Staufen, Germany) and then briefly  
12 sonicated (Branson Sonifier B12, Danbury, CT). The resulting homogenate was centrifuged at  
13  $6000 \times g$  (Sigma 113 Centrifuge, Osterode am Harz, Germany) for 10 min at  $4^{\circ}\text{C}$ . After  
14 determination of protein concentration with the Bradford method (Bio-Rad), the post-nuclear  
15 supernatant (total protein extract) was kept at  $-80^{\circ}\text{C}$ . None of the patients suffered from  
16 peritonitis at the time of biopsy. Informed consent was obtained from all subjects. The use of  
17 human biopsy samples has been approved by the Ethical Review Board of the Cliniques  
18 universitaires Saint-Luc.

## 19 ***Immunoblot***

20 SDS-PAGE and immunoblotting were performed as previously described (9). The extracts  
21 were solubilized by heating ( $60^{\circ}\text{C}$  or  $95^{\circ}\text{C}$ , for 2 min) in sample buffer (1.5% sodium dodecyl  
22 sulfate, 10 mM Tris-HCl, pH 6.8, 0.6% dithiothreitol, and 6% [vol/vol] glycerol). Proteins  
23 were separated by electrophoresis through 7.5% or 12% acrylamide slabs and transferred to  
24 nitrocellulose. After Ponceau Red (Sigma, Saint-Louis, MO) staining to check transfer  
25 efficiency, destained membranes were blocked for 30 min at room temperature in blocking

1 buffer (50 mM sodium phosphate buffer, 150 mM NaCl, 0.05% Tween 20, pH 7.4)  
2 comprising 5% nonfat dry milk, followed by incubation with the primary antibody (diluted in  
3 blocking buffer with 2% bovine serum albumin) at 4°C for 16 to 18 h. The membranes were  
4 then washed, incubated for 1 h at room temperature with the appropriate peroxidase-labeled  
5 antibody (1:5000 dilution), washed again, and visualized with enhanced chemiluminescence  
6 (Amersham, Arlington Heights, IL). Quantification was performed using the gel analysis  
7 option of ImageJ (1.47 v) software.

### 8 ***Immunohistochemistry and immunofluorescence***

9 Immunoperoxidase staining on human peritoneum sections was performed as described  
10 previously (9,10). Peritoneal sections (5 µm thick) were cut from paraffin blocks,  
11 deparaffinized, and rehydrated progressively. After inhibition of endogenous peroxidase by  
12 incubation in 0.3% H<sub>2</sub>O<sub>2</sub> for 30 min, the slides were blocked with 10% normal goat or horse  
13 serum in PBS for 20 min at room temperature. All subsequent antibody incubations were  
14 carried out for 45 min at room temperature in a humidified chamber. Sections were incubated  
15 with the primary antibody diluted in PBS containing 2% bovine serum albumin, washed,  
16 incubated with biotinylated goat anti-rabbit or horse anti-mouse IgG (Vector, Burlingame,  
17 CA), washed, and then incubated for 45 min with the avidin-biotin peroxidase complex  
18 (Vector, Burlingame, CA). After washing, antibody localizations were visualized using  
19 aminoethylcarbazole. Sections were scanned using a slide scanner Leica SCN400 (Leica,  
20 Heerbrugg, Switzerland).

21 Immunofluorescence staining was performed on paraffin-embedded sections of human  
22 peritoneal biopsies using a sequential staining protocol as described previously (11).

23 Deparaffinized sections were incubated with 10% normal goat serum for 20 min before  
24 adding the first primary antibody diluted in phosphate-buffered saline containing 2% bovine  
25 serum albumin for 1 h. After washing, sections were incubated with AlexaFluor 633-labelled

1 secondary anti-IgG antibodies (Invitrogen, Carlsbad, Belgium) for 45 min. The co-staining  
2 was performed by adding the second primary antibody which was then revealed with  
3 AlexaFluor 488-labeled secondary anti-IgG antibodies before mounting in Prolong Gold Anti-  
4 fade reagent (Invitrogen, Carlsbad, Belgium). Sections were viewed under a Zeiss  
5 LSM510Meta Confocal microscope (Carl Zeiss, Zaventem, Belgium), using x20/0.8 Plan-  
6 Apochromat and x63/1.4 Plan-Apochromat oil-immersion objectives (Zeiss, Wetzlar,  
7 Germany). Five pictures of peritoneal vessels were recorded for each patient, with parameters  
8 kept constant during the whole acquisition. Vascular densities of AQP1 and vWF were  
9 estimated by the mean fluorescence intensities in positive areas for each picture using ImageJ  
10 software (1.47v); the mean value for each patient was used for analysis.

### 11 ***Antibodies***

12 We used the following antibodies: mouse monoclonal anti-human eNOS (Transduction  
13 Laboratories, Lexington, KY); purified rabbit anti-von Willebrand factor (DAKO, Glostrup,  
14 Denmark), monoclonal anti-human VEGF (Santa Cruz Biotechnology, Santa Cruz, CA,  
15 USA); polyclonal rabbit anti-human AQP1 (Chemicon International, Temecula, CA).

### 16 ***Picrosirius red staining***

17 5 µm sections were deparaffinized, rehydrated, treated with 1% phosphomolybdic acid and  
18 incubated in saturated picric acid solution containing 1% sirius red for 2h at room temperature  
19 before washing in 0.01N hydrochloric acid and mounting. Samples were scanned using a  
20 SCN400 slide scanner (Leica, Heerbrugg, Switzerland) and also processed using an Axioskop  
21 40 microscope (Zeiss, Wetzlar, Germany) equipped with filters to provide circularly polarized  
22 illumination, using a 20x objective.

### 23 ***Image analysis***

1 The adequacy of each specimen was evaluated according to well-established criteria (12) and  
2 inadequate specimens were not included in this study.

3 *Peritoneal fibrosis.* The extent of peritoneal fibrosis required the presence of mesothelial,  
4 submesothelial, and adipose tissue layers. Submesothelial thickness was defined by the  
5 thickness of submesothelial compact zone between basal border of surface mesothelial cells  
6 and upper border of peritoneal adipose tissue. Five portions were randomly selected for the  
7 measurement of submesothelial thickness using TissueIA software (SlidePath), and the  
8 average was used for analysis.

9 *Vasculopathy.* Vasculopathy was assessed using two different methods. The first graded the  
10 degree of vasculopathy from 1 to 4, as previously described (13): a grade of 1 or 2 indicating  
11 subendothelial hyaline material  $<7$  or  $>7$   $\mu\text{m}$  in thickness, respectively; a grade of 3, luminal  
12 distortion or narrowing; a grade of 4: luminal obliteration. The second method assessed  
13 vasculopathy in post-capillary venules (external diameter of 25 to 50  $\mu\text{m}$ ) by calculating the  
14 ratio of luminal diameter to vessel external diameter (L/V), which represents an extent of  
15 patency of the blood vessel (12). When different vessels showed different severities of the  
16 vasculopathy, the most severely affected vessel of each specimen was chosen for the  
17 measurement. The average of two L/V measured by two examiners was taken as the  
18 representative value of that case. Inter-observer agreement for both vasculopathy grade  
19 (unweighed  $K=0.88$ ) and L/V ratio (Pearson  $r = 0.87$ ,  $P<0.0001$ ) was excellent.

20 *Vascular proliferation.* Vascular proliferation was assessed by the density vascular structures  
21 stained with anti-vWF antibodies ( $n$  vessels/field, with a field area of 0.4  $\text{mm}^2$  at a  
22 magnification of 20x). Five measures of vascular density were performed in randomly  
23 selected areas of each specimen, by two independent scientists, and the mean of these  
24 measures was used for analysis. Correlation between observers was excellent (Pearson  $r =$   
25 0.93;  $P<0.0001$ ).

1 *Collagen volume fraction and collagen structure.* Collagen volume fraction and collagen  
2 structure were assessed using picrosirius red polarization microscopy and image analysis  
3 using ImageJ (1.47v). Collagen volume fraction was calculated as previously described (14),  
4 as the sum of stained tissue divided by the sum of submesothelial area, a measure that closely  
5 correlates with hydroxyproline concentration in the tissue (15).

## 6 ***Statistics***

7 Data are presented as mean  $\pm$  SEM. Comparisons between the means from different groups  
8 were performed using unpaired t-tests, Fisher's exact test, or one-way ANOVA, followed by  
9 Bonferroni's multiple comparison tests, as appropriated. Trends were assessed by linear  
10 ordinary least square regression. Multivariate analysis was performed using a logistic  
11 regression random-effects model and included potential risk factors for EPS (age at PD start,  
12 PD duration, peritonitis rate, beta blocker use, residual renal function, glucose exposure) in a  
13 first model; in a second model, the mean value of sodium sieving during the last 2 years of  
14 PD was added to these variables. Probabilities of EPS in function of sodium sieving and UF  
15 levels were estimated by multivariate logistic regression. All analyses were performed by  
16 GraphPad Prism (6.01 v) or Stata (12 v) software. Significance level is indicated in each  
17 figure (\* $p$ <0.05, \*\* $p$ <0.01, \*\*\* $p$ <0.001).

18

19

## 1 REFERENCES

- 2 1. Korte MR, Sampimon DE, Lingsma HF, Fieren MW, Looman CW, Zietse R, Weimar W,  
3 Betjes MG; Dutch Multicenter EPS Study: Risk factors associated with encapsulating  
4 peritoneal sclerosis in Dutch EPS study. *Perit Dial Int* 31: 269-278, 2011
- 5 2. Kawaguchi Y, Kawanishi H, Mujais S, Topley N, Oreopoulos DG: Encapsulating  
6 peritoneal sclerosis: definition, etiology, diagnosis, and treatment. International Society  
7 for Peritoneal Dialysis Ad Hoc Committee on Ultrafiltration Management in Peritoneal  
8 Dialysis. *Perit Dial Int* 20: S43-S55, 2000
- 9 3. Summers AM, Abrahams AC, Alscher MD, Betjes M, Boeschoten EW, Braun N,  
10 Brenchley PE, Davies S, Dunn L, Engelsman L, Fieren M, Garosi G, Goffin E, Heuveling  
11 L, Korte M, Lindholm B, Rutherford P, Struijk D, Verduijn M, Verger C, Westerhuis R:  
12 A collaborative approach to understanding EPS: the European perspective. *Perit Dial Int*  
13 31: 245-248, 2011
- 14 4. La Milia V, Pozzoni P, Virga G, Crepaldi M, Del Vecchio L, Andrulli S, Locatelli F:  
15 Peritoneal transport assessment by peritoneal equilibration test with 3.86% glucose: a  
16 long-term prospective evaluation. *Kidney Int* 69: 927-933, 2006
- 17 5. Clerbaux G, Francart J, Wallemacq P, Robert A, Goffin E: Evaluation of peritoneal  
18 transport properties at onset of peritoneal dialysis and longitudinal follow-up. *Nephrol*  
19 *Dial Transplant* 21: 1032-1039, 2006
- 20 6. Twardowski ZJ, Nolph KD, Khanna R, Prowant BF, Ryan LP, Moore HL, Nielsen MP:  
21 Peritoneal equilibration test. *Perit Dial Bull* 7: 138-147, 1987
- 22 7. Mujais S, Nolph K, Gokal R, Blake P, Burkart J, Coles G, Kawaguchi Y, Kawanishi H,  
23 Korbet S, Krediet R, Lindholm B, Oreopoulos D, Rippe B, Selgas R: Evaluation and  
24 management of ultrafiltration problems in peritoneal dialysis. International Society for



- 1 Peritoneal Dialysis Ad Hoc Committee on Ultrafiltration Management in Peritoneal  
2 Dialysis. *Perit Dial Int* 20: S5-S21, 2000
- 3 8. Waniewski J, Heimbürger O, Weryński A, Lindholm B: Aqueous solute concentrations  
4 and evaluation of mass transport coefficients in peritoneal dialysis. *Nephrol Dial  
5 Transplant* 7: 50-56, 1992
- 6 9. Combet S, Van Landschoot M, Moulin P, Piech A, Verbavatz JM, Goffin E, Balligand JL,  
7 Lameire N, Devuyst O: Regulation of aquaporin-1 and nitric oxide synthase isoforms in a  
8 rat model of acute peritonitis. *J Am Soc Nephrol* 10: 2185-2196, 1999
- 9 10. Devuyst O, Nielsen S, Cosyns JP, Smith BL, Agre P, Squifflet JP, Pouthier D, Goffin E:  
10 Aquaporin-1 and endothelial nitric oxide synthase expression in capillary endothelia of  
11 human peritoneum. *Am J Physiol* 275: H234-H242, 1998
- 12 11. de Arteaga J, Ledesma F, Garay G, Chiurciu C, de la Fuente J, Douthat W, Massari P,  
13 Terry S, Devuyst O: High-dose steroid treatment increases free water transport in  
14 peritoneal dialysis patients. *Nephrol Dial Transplant* 26: 4142-4145, 2011
- 15 12. Honda K, Hamada C, Nakayama M, Miyazaki M, Sherif AM, Harada T, Hirano H;  
16 Peritoneal Biopsy Study Group of the Japanese Society for Peritoneal Dialysis: Impact of  
17 uremia, diabetes, and peritoneal dialysis itself on the pathogenesis of peritoneal sclerosis:  
18 a quantitative study of peritoneal membrane morphology. *Clin J Am Soc Nephrol* 3: 720-  
19 728, 2008
- 20 13. Williams JD, Craig KJ, Topley N, Von Ruhland C, Fallon M, Newman GR, Mackenzie  
21 RK, Williams GT; Peritoneal Biopsy Study Group: Morphologic changes in the peritoneal  
22 membrane of patients with renal disease. *J Am Soc Nephrol* 13: 470-479, 2002
- 23 14. Ducharme A, Frantz S, Aikawa M, Rabkin E, Lindsey M, Rohde LE, Schoen FJ, Kelly  
24 RA, Werb Z, Libby P, Lee RT: Targeted deletion of matrix metalloproteinase-9 attenuates

- 1 left ventricular enlargement and collagen accumulation after experimental myocardial  
2 infarction. *J Clin Invest* 106: 55-62, 2000
- 3 15. Brilla CG, Pick R, Tan LB, Janicki JS, Weber KT: Remodeling of the rat right and left  
4 ventricles in experimental hypertension. *Circ Res* 67: 1355-1364, 1990

1 **SUPPLEMENTAL FIGURES**

2 **Supplemental figure 1**

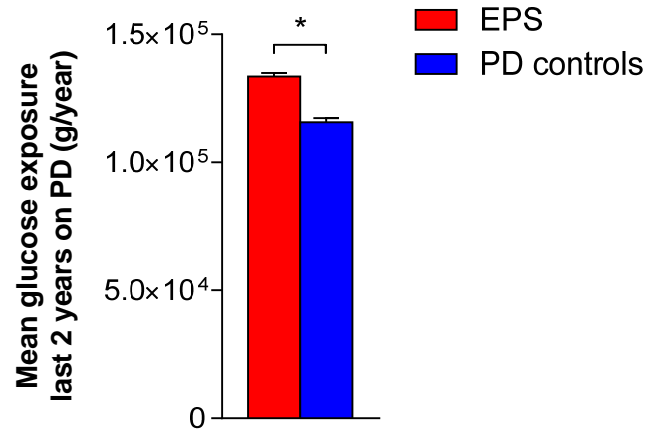

3

4 **Mean glucose exposure during the last two years on PD in EPS and PD controls.** Glucose exposure was  
5 significantly higher during the last 2 years on PD in the EPS group as compared with PD controls  
6 (133,606±1332 versus 115,697±1586 g/year in EPS and PD controls, respectively;  $P=0.01$ ).

1 **Supplemental figure 2**

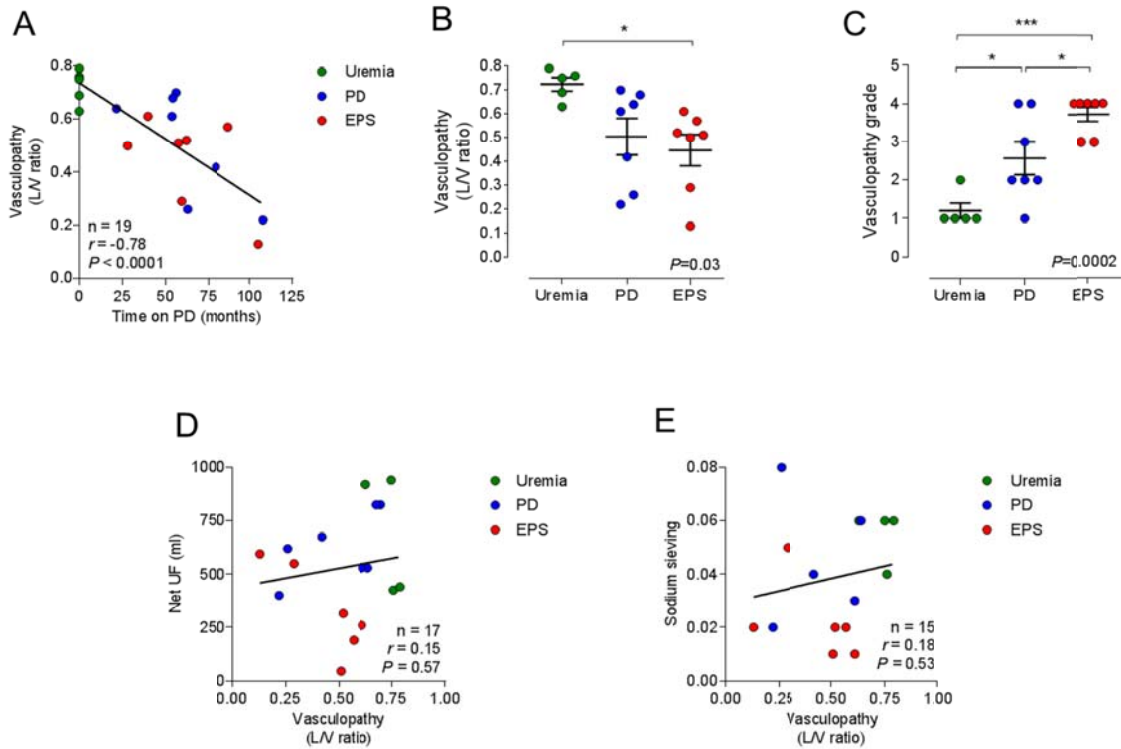

2

3 **Impaired water transport does not correlate with peritoneal vasculopathy.** (A) The degree of vasculopathy  
 4 (lumen-to-vessel ratio, L/V) is inversely correlated with time on PD (Pearson  $r = -0.78$ ,  $P < 0.0001$ ). (B-C) EPS  
 5 patients tend to have a higher degree of peritoneal vasculopathy (L/V ratio), and have a higher vasculopathy  
 6 grade as compared with PD controls. (D-E) There is no correlation between net ultrafiltration or sodium sieving  
 7 and the degree of vasculopathy in this cohort (Pearson  $r = 0.15$ ,  $P = 0.57$  and Pearson  $r = 0.18$ ,  $P = 0.53$ ,  
 8 respectively). Peritoneal samples are from 5 uremic, 7 long-term PD without EPS, and 7 EPS patients. Circles  
 9 represent individuals; green circles for uremic, blue for PD controls, and red for EPS patients.

10

1 **SUPPLEMENTAL TABLE**

2 **Supplemental table 1.** Clinical and functional characteristics of PD patients in which  
 3 peritoneal biopsies were analyzed.

|                                                  | <b>Uremic</b> | <b>Long-term PD</b> | <b>EPS</b>   |
|--------------------------------------------------|---------------|---------------------|--------------|
|                                                  | <i>n = 5</i>  | <i>n = 7</i>        | <i>n = 7</i> |
| PD duration (months)                             | -             | 62.4 ± 9.3          | 62.8 ± 9.2   |
| Charlson comorbidity index                       | 4.8 ± 1.0     | 4.0 ± 0.8           | 4.9 ± 1.0    |
| Diabetes, %                                      | 20%           | 29%                 | 29%          |
| Residual diuresis at PD start, ml/day            | 1252 ± 224    | 835 ± 143           | 1083 ± 159   |
| Total number of peritonitis                      | -             | 1.5 ± 0.4           | 1.4 ± 0.4    |
| Functional parameters at the time of biopsy      |               |                     |              |
| <i>Net UF (ml)</i>                               | 681 ± 124     | 629 ± 55            | 326 ± 79*    |
| <i>D/P creatinine 4h</i>                         | 0.75 ± 0.07   | 0.75 ± 0.02         | 0.84 ± 0.04  |
| <i>Sodium sieving</i>                            | 0.06 ± 0.00   | 0.05 ± 0.01         | 0.02 ± 0.01* |
| <i>Time between last PET and biopsy (months)</i> | -             | 7.5 ± 1.6           | 9.1 ± 2.1    |

4 EPS, encapsulating peritoneal sclerosis; PD, peritoneal dialysis; UF, ultrafiltration

5
